# Supplementary material for: New Chlorinated Metabolites and Antiproliferative Polyketone from the Mangrove Sediments-Derived Fungus Mollisia sp. SCSIO41409
Source: MDPI journal article supplement (doi:10.3390/md21010032), 2022-12-30
Supplement: s1 [file s1]

**Supporting Information**

**New Chlorinated Metabolites and Antiproliferative  
Polyketone from the Mangrove Sediments-Derived Fungus  
*Mollisia* sp. SCSIO41409**

**Jian Cai <sup>1,2,†</sup>, Xueni Wang <sup>1,3,†</sup>, Xia Gan <sup>3,4</sup>, Qian Zhou <sup>3</sup>, Xiaowei Luo <sup>4</sup>, Bin Yang <sup>1,2</sup>, Yonghong  
Liu <sup>1,2</sup>, Disna Ratnasekera <sup>5,\*</sup> and Xuefeng Zhou <sup>1,2,\*</sup>**

<sup>1</sup> CAS Key Laboratory of Tropical Marine Bio-resources and Ecology, Guangdong Key Laboratory of Marine Materia Medica, South China Sea Institute of Oceanology, Chinese Academy of Sciences, Guangzhou 510301, China

<sup>2</sup> University of Chinese Academy of Sciences, Beijing 100049, China

<sup>3</sup> Guangxi Zhuang Yao Medicine Center of Engineering and Technology, Guangxi University of Chinese Medicine, Nanning 530200, China

<sup>4</sup> Institute of Marine Drugs, Guangxi University of Chinese Medicine, Nanning 530200, China

<sup>5</sup> Department of Agricultural Biology, Faculty of Agriculture, University of Ruhuna, 81000, Sri Lanka

\* Correspondence: [disnar@agbio.ruh.ac.lk](mailto:disnar@agbio.ruh.ac.lk) (D.R.); [xfzhou@scsio.ac.cn](mailto:xfzhou@scsio.ac.cn) (X.Z.)

† These authors contributed equally to this work.

## Table of Contents

|                                                                                        |    |
|----------------------------------------------------------------------------------------|----|
| The physicochemical data of the known compounds <b>2</b> and <b>4–9</b> .....          | 3  |
| Figure S1: $^1\text{H}$ NMR spectrum of <b>1</b> in DMSO- $d_6$ .....                  | 5  |
| Figure S2: $^{13}\text{C}$ NMR spectrum of <b>1</b> in DMSO- $d_6$ .....               | 5  |
| Figure S3: DEPT135 spectrum of <b>1</b> in DMSO- $d_6$ . ....                          | 6  |
| Figure S4: HSQC spectrum of <b>1</b> in DMSO- $d_6$ . ....                             | 6  |
| Figure S5: HMBC spectrum of <b>1</b> in DMSO- $d_6$ . ....                             | 7  |
| Figure S6: $^1\text{H}$ – $^1\text{H}$ COSY spectrum of <b>1</b> in DMSO- $d_6$ . .... | 7  |
| Figure S7: HRESIMS spectrum of <b>1</b> .....                                          | 8  |
| Figure S8: IR spectrum of <b>1</b> . ....                                              | 8  |
| Figure S9: UV spectrum of <b>1</b> in MeOH. ....                                       | 9  |
| Figure S10: $^1\text{H}$ NMR spectrum of <b>3</b> in DMSO- $d_6$ .....                 | 9  |
| Figure S11: $^{13}\text{C}$ NMR spectrum of <b>3</b> in DMSO- $d_6$ .....              | 10 |
| Figure S12: HRESIMS spectrum of <b>3</b> . ....                                        | 10 |
| Figure S13: IR spectrum of <b>3</b> . ....                                             | 11 |
| Figure S14: UV spectrum of <b>3</b> in MeOH. ....                                      | 11 |
| ITS sequence of the strain <i>Mollisia</i> sp. SCSIO41409 .....                        | 12 |

## The physicochemical data of the known compounds 2 and 4–9

5-hydroxy-2,3-dimethyl-7-methoxychromone (**2**): white needles;  $^1\text{H}$  NMR (500 MHz, DMSO- $d_6$ )  $\delta$  13.00 (s, 1H, 5-OH), 6.53 (d,  $J = 2.3$  Hz, 1H, H-6), 6.33 (d,  $J = 2.3$  Hz, 1H, H-8), 3.83 (s, 3H, H-11), 2.39 (s, 3H, H-9), 1.91 (s, 3H, H-10);  $^{13}\text{C}$  NMR (125 MHz, DMSO)  $\delta$  181.7 (C-4), 165.4 (C-5), 164.2 (C-2), 161.6 (C-5), 157.6 (C-8a), 114.9 (C-3), 104.2 (C-4a), 98.1 (C-6), 92.3 (C-8), 56.5 (C-11), 18.8 (C-9), 9.3 (C-10).

Stemphone C (**4**): yellow needles; HRESIMS  $m/z$  515.3003  $[\text{M}+\text{H}]^+$  (calcd  $\text{C}_{30}\text{H}_{43}\text{O}_7$ , 515.3003);  $[\alpha]_{\text{D}}^{25} +160.9$  (c 0.01,  $\text{CH}_3\text{OH}$ );  $^1\text{H}$  NMR (500 MHz, DMSO- $d_6$ )  $\delta$  6.59 (s, 1H, H-11), 5.52 (q,  $J = 6.5$  Hz, 1H, H-2), 5.16 (d,  $J = 9.2$  Hz, 1H, H-4), 4.14 (s, 1H, 22-OH), 3.21 (dd,  $J = 9.1, 6.9$  Hz, 1H, H-21), 3.17 (m, 1H, overlapped, H-21), 3.08 (dd,  $J = 11.4, 3.5$  Hz, 1H, H-17), 2.36 (dd,  $J = 18.4, 4.6$  Hz, 1H, H-12a), 2.09 (m, 1H, H-12b), 2.0 (m, 3H, H-15, 19a), 1.86 (s, 3H, H-30), 1.73 (m, 2H, H-16), 1.57 (s, 3H, H-28), 1.56 (d,  $J = 4.0$  Hz, 3H, H-1), 1.45 (m, 3H, overlapped, H-13, 20), 1.24 (m, 1H, H-19b), 1.19 (s, 3H, H-26), 1.08 (s, 3H, H-24), 1.04 (s, 3H, H-23), 0.95 (d,  $J = 7.1$  Hz, 3H, H-27), 0.81 (s, 3H, H-25);  $^{13}\text{C}$  NMR (125 MHz, DMSO)  $\delta$  186.5 (C-10), 180.9 (C-7), 169.3 (C-29), 151.7 (C-8), 147.3 (C-6), 132.3 (C-11), 132.1 (C-3), 124.5 (C-2), 117.6 (C-9), 84.8 (C-21), 83.2 (C-17), 81.0 (C-4), 80.2 (C-14), 70.3 (C-22), 45.7 (C-13), 36.8 (C-15), 36.0 (C-19), 35.0 (C-18), 33.1 (C-5), 26.9 (C-24), 25.0 (C-16), 24.6 (C-23), 20.7 (C-30), 20.5 (C-20), 20.5 (C-26), 16.5 (C-27), 16.0 (C-12), 12.9 (C-1), 11.9 (C-25), 11.2 (C-28).

*Cis*-cyclo (Tyr-Ile) (**5**): white powder;  $^1\text{H}$  NMR (500 MHz, DMSO- $d_6$ )  $\delta$  9.15 (s, 1H, 11-OH), 8.03 (s, 1H, NH-1), 7.86 (s, 1H, NH-4), 6.95 (d,  $J = 8.4$  Hz, 2H, H-9, 13), 6.61 (d,  $J = 8.4$  Hz, 2H, H-10, 12), 4.11 (t,  $J = 4.1$  Hz, 1H, H-3), 3.55 (s, 1H, H-6), 3.04 (dd,  $J = 13.7, 4.0$  Hz, 1H, H-7a), 2.73 (dd,  $J = 13.7, 4.8$  Hz, 1H, H-7b), 1.41 (m, 1H, H-14), 0.60 (d,  $J = 6.8$  Hz, 1H, H-17), 0.59 (t,  $J = 7.0$  Hz, 3H, H-16).  $^{13}\text{C}$  NMR (125 MHz, DMSO)  $\delta$  166.5 (C-2), 166.4 (C-5), 156.3 (C-11), 131.3 (C-9), 131.3 (C-13), 126.2 (C-8), 114.7 (C-10), 114.7 (C-12), 58.9 (C-3), 55.3 (C-6), 37.9 (C-7), 36.9 (C-14), 23.1 (C-15), 14.6 (C-17), 11.7 (C-16).

4,8-dihydroxy-1-tetra-lone (**6**): white solid;  $^1\text{H}$  NMR (500 MHz, DMSO- $d_6$ )  $\delta$  12.41 (s, 1H, 8-OH), 7.55 (t,  $J = 8.0$  Hz, 1H, H-6), 7.08 (d,  $J = 7.5$  Hz, 1H, H-5), 6.85 (dd,  $J = 8.5, 1.1$  Hz, 1H, H-7), 4.75 (dt,  $J = 9.4, 4.8$  Hz, 1H, H-4), 2.74 (m, 2H, H-2), 2.19 (m, 1H, H-3);  $^{13}\text{C}$  NMR (125 MHz, DMSO)  $\delta$  205.3 (C-1), 161.5 (C-8), 148.7 (C-4a), 136.8 (C-6), 117.4 (C-7), 115.9 (C-1a), 115.1 (C-8a), 66.0 (C-

4), 35.3 (C-2), 31.5 (C-3).

Cyclo (Phe-Tyr) (**7**): white powder;  $^1\text{H}$  NMR (500 MHz, DMSO- $d_6$ )  $\delta$  9.22 (1H, s, 11-OH); 7.85 (s, NH-1, 4), 7.27 (m,  $J = 7.5$  Hz, 2H, H-17, 19), 7.20 (t,  $J = 7.3$  Hz, 1H, H-18), 7.03 (d,  $J = 7.0$  Hz, 2H, H-16, 20), 6.83 (d,  $J = 8.4$  Hz, 2H, H-9, 13), 6.67 (d,  $J = 8.4$  Hz, 2H, H-10, 12), 3.95 (m, 1H, H-3), 3.89 (d,  $J = 6.3$  Hz, 1H, H-6), 2.18 (m, 2H, H-7);  $^{13}\text{C}$  NMR (125 MHz, DMSO)  $\delta$  166.3 (C-2), 166.2 (C-5), 156.1 (C-11), 136.7 (C-15), 130.9 (C-9, 13), 129.8 (C-17, 19), 128.2 (C-16, 20), 126.5 (C-8), 126.4 (C-18), 115.0 (C-10, 12), 55.7 (C-3), 55.4 (C-6), 39.2 (C-14), 38.5 (C-7).

Tenuissimasatin (**8**): white solid;  $[\alpha]_{\text{D}}^{25} -15.7$  (c 0.01,  $\text{CH}_3\text{OH}$ );  $^1\text{H}$  NMR (500 MHz, DMSO- $d_6$ )  $\delta$  7.52 (t,  $J = 7.8$  Hz, 1H, H-6), 7.01 (d,  $J = 7.4$  Hz, 1H, H-7), 6.90 (d,  $J = 8.1$  Hz, 1H, H-5), 5.72 (dd,  $J = 8.5$ , 4.0 Hz, 1H, H-3), 3.64 (s, 3H, H-12), 3.19 (dd,  $J = 16.6$ , 3.9 Hz, 1H, H-4a), 2.76 (dd,  $J = 16.6$ , 8.5 Hz, 1H, H-4b);  $^{13}\text{C}$  NMR (125 MHz, DMSO)  $\delta$  169.9 (C-1), 167.6 (C-11), 156.9 (C-8), 151.1 (C-10), 136.1 (C-6), 115.9 (C-7), 112.4 (C-5), 111.2 (C-9), 75.7 (C-3), 51.7 (C-12), 38.7 (C-4).

4-methyl-5,6-dihydro-2H-pyran-2-one (**9**): colorless oil;  $^1\text{H}$  NMR (500 MHz, DMSO- $d_6$ )  $\delta$  5.74 (d,  $J = 1.5$  Hz, 1H, H-3), 4.29 (t,  $J = 6.2$  Hz, 2H, H-6), 2.37 (t,  $J = 6.4$  Hz, 2H, H-5), 1.96 (d,  $J = 1.3$  Hz, 3H, H-7);  $^{13}\text{C}$  NMR (125 MHz, DMSO)  $\delta$  164.0 (C-2), 159.7 (C-4), 115.5 (C-3), 65.7 (C-6), 28.6 (C-5), 22.5 (C-7).

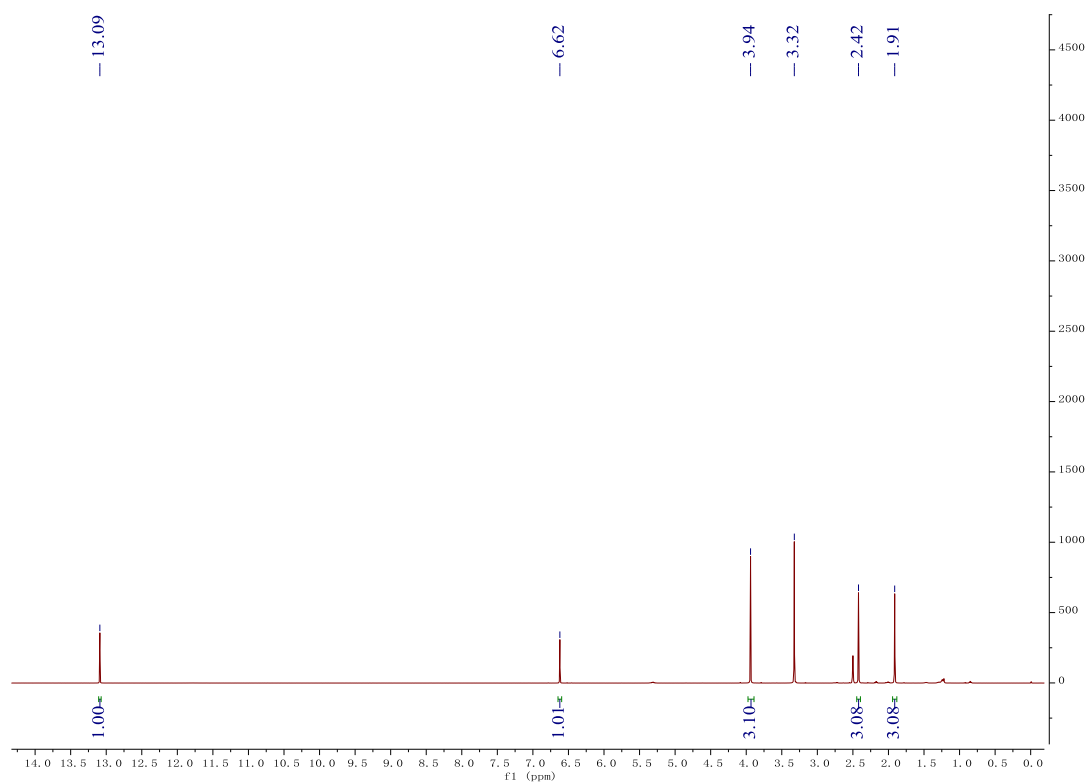

**Figure S1:** <sup>1</sup>H NMR spectrum of **1** in DMSO-*d*<sub>6</sub>.

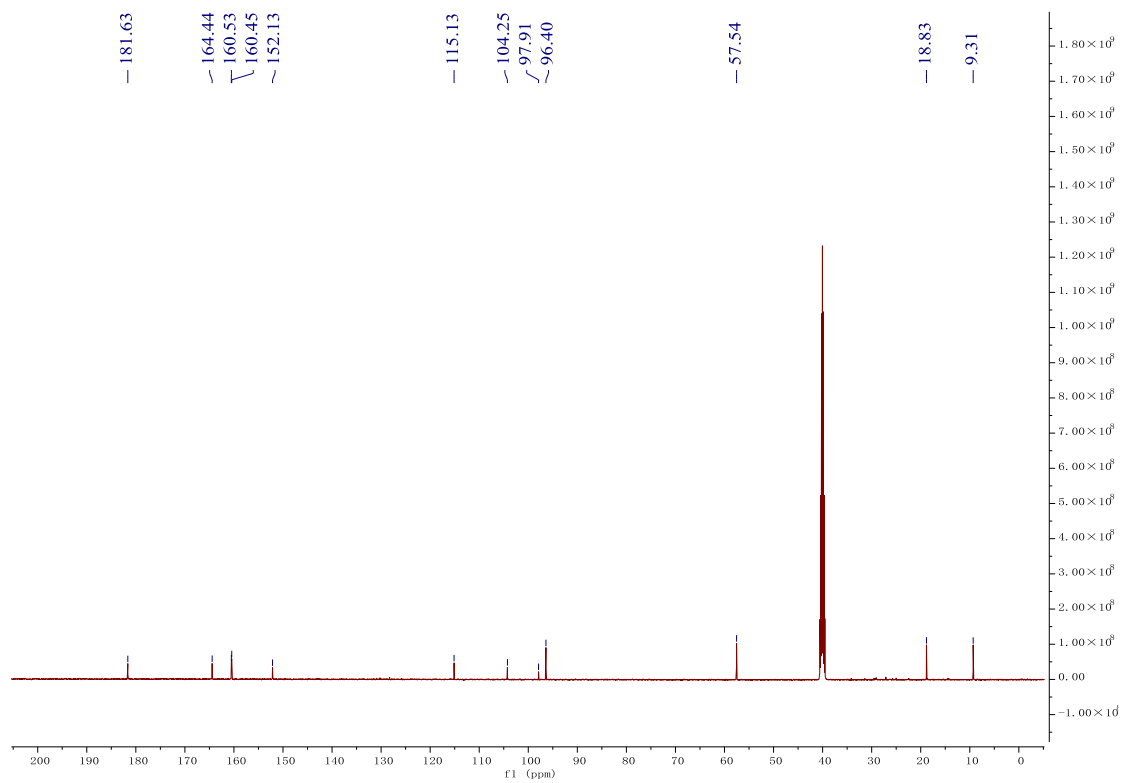

**Figure S2:** <sup>13</sup>C NMR spectrum of **1** in DMSO-*d*<sub>6</sub>.

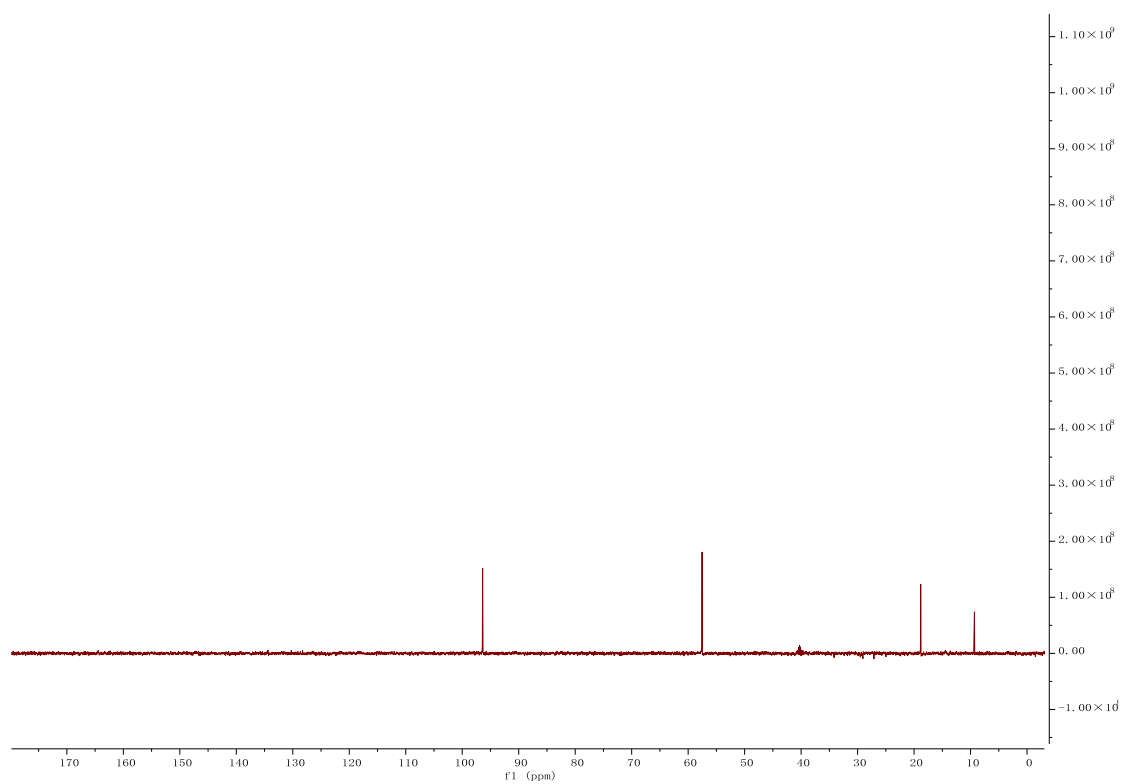

**Figure S3:** DEPT135 spectrum of **1** in DMSO-*d*<sub>6</sub>.

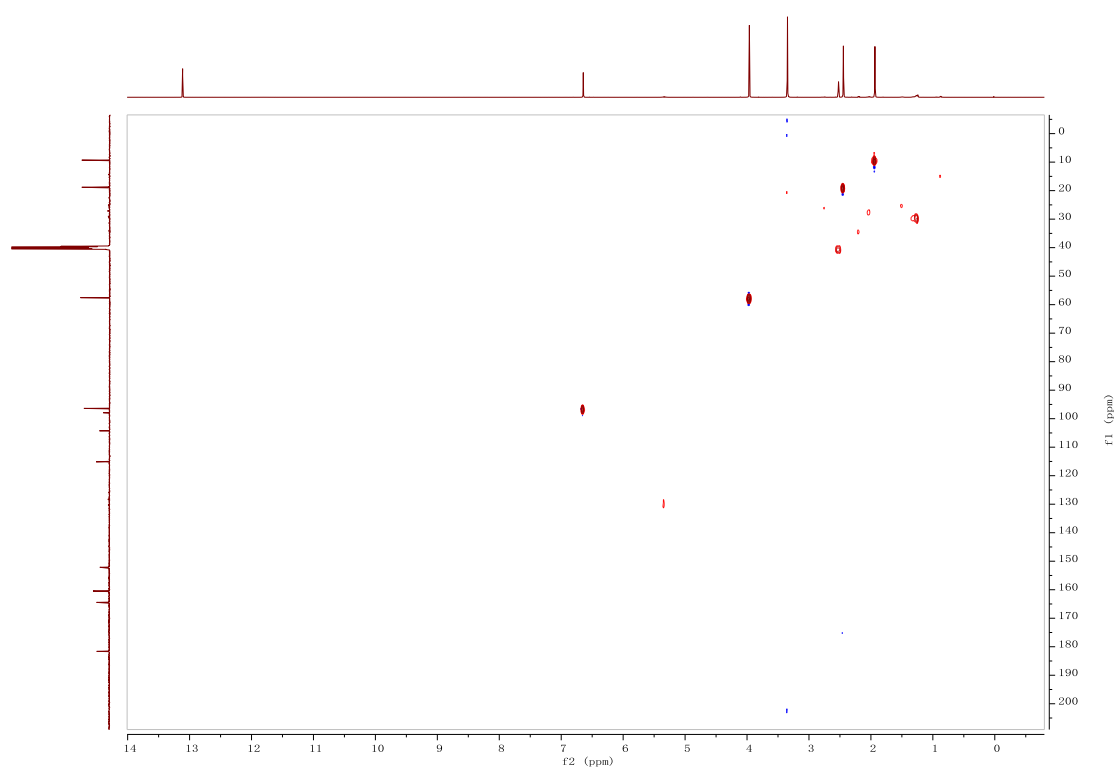

**Figure S4:** HSQC spectrum of **1** in DMSO-*d*<sub>6</sub>.

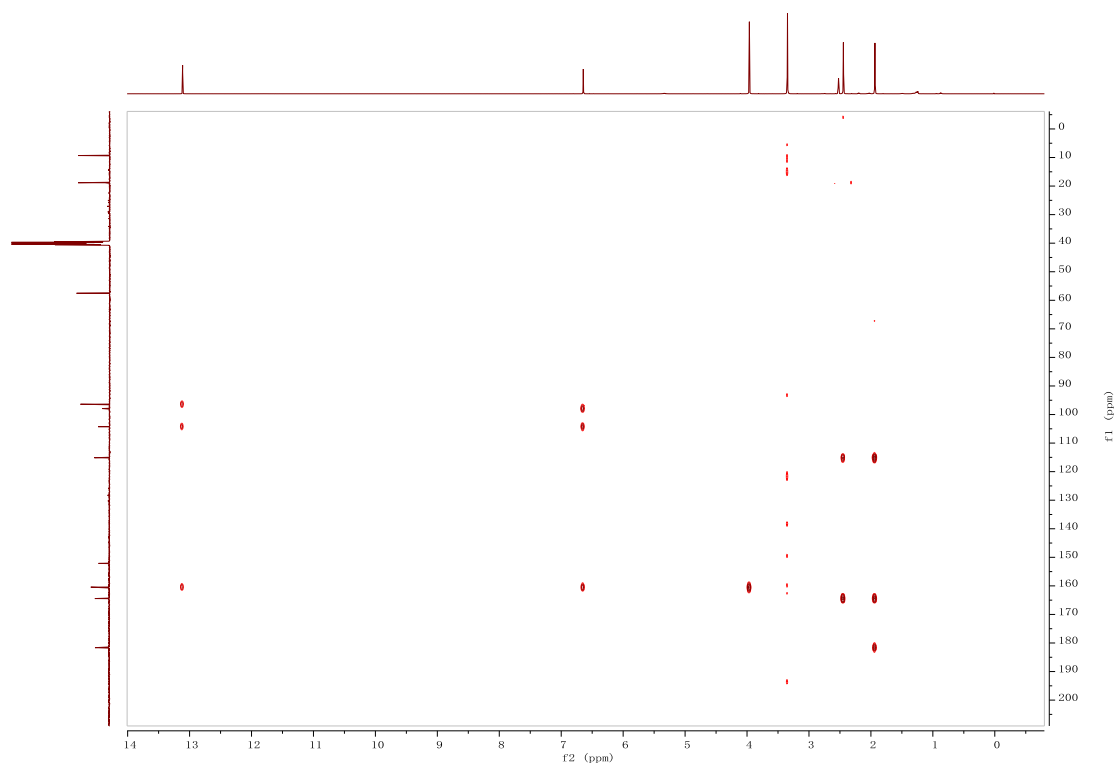

**Figure S5:** HMBC spectrum of **1** in DMSO- $d_6$ .

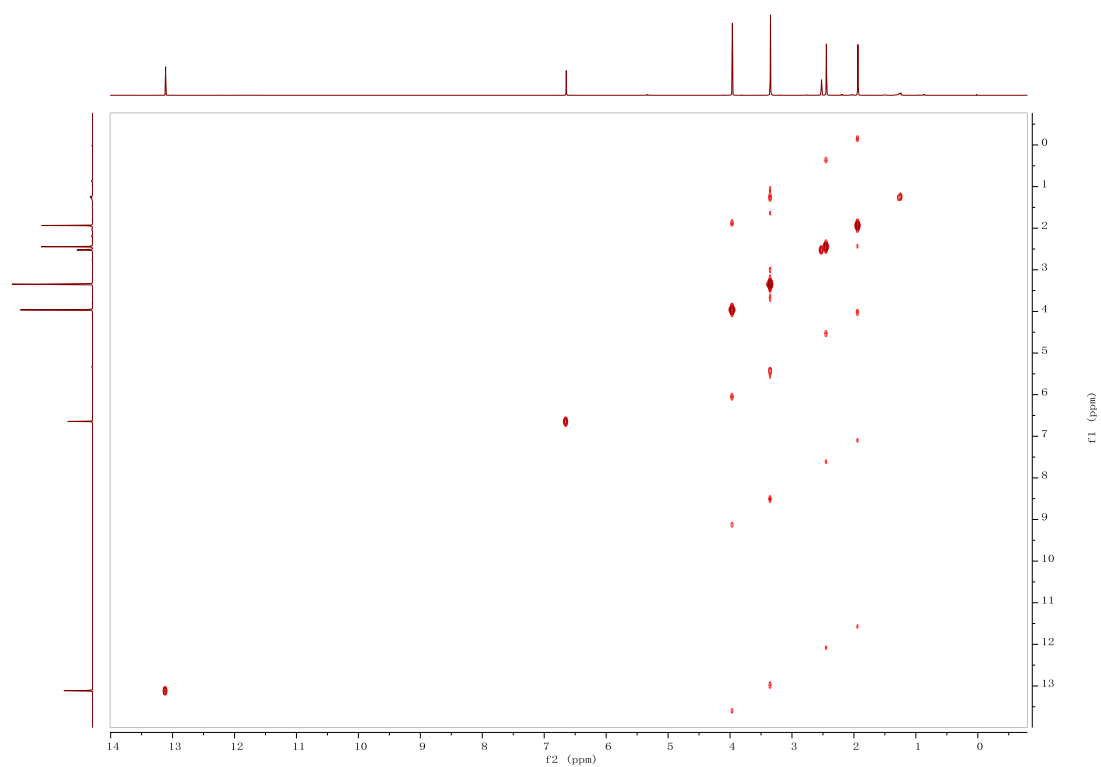

**Figure S6:**  $^1\text{H}$ - $^1\text{H}$  COSY spectrum of **1** in DMSO- $d_6$ .

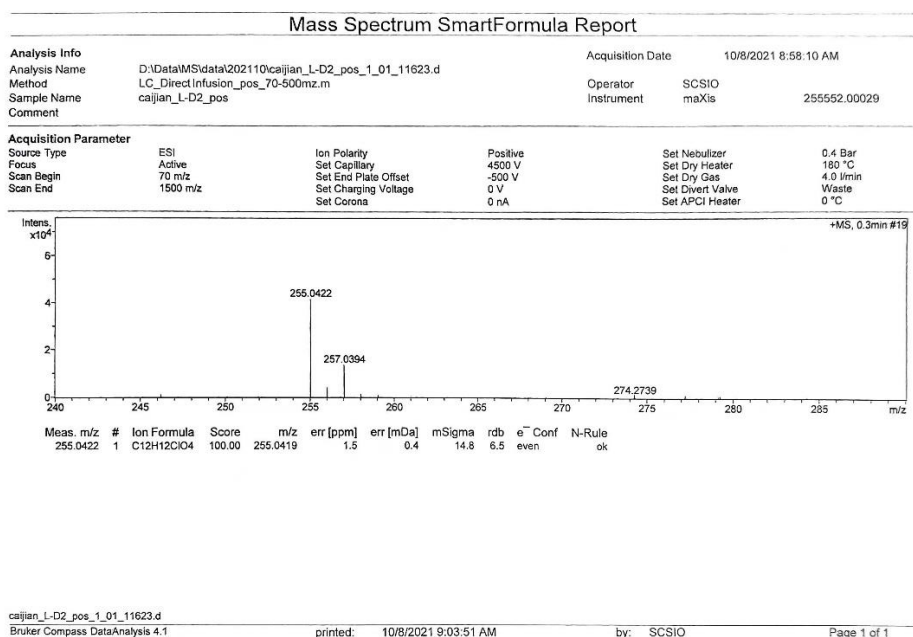

**Figure S7:** HRESIMS spectrum of **1**.

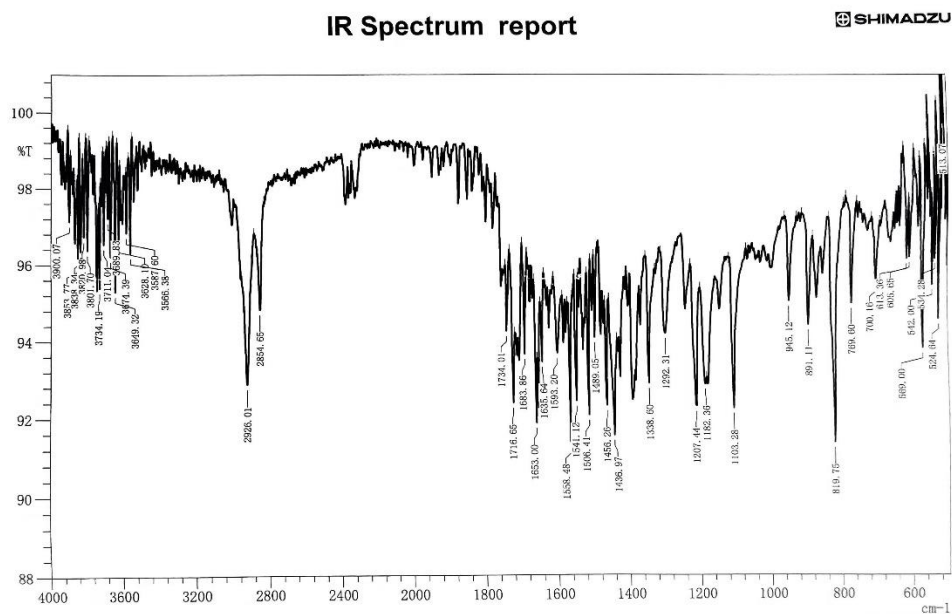

**Figure S8:** IR spectrum of **1**.



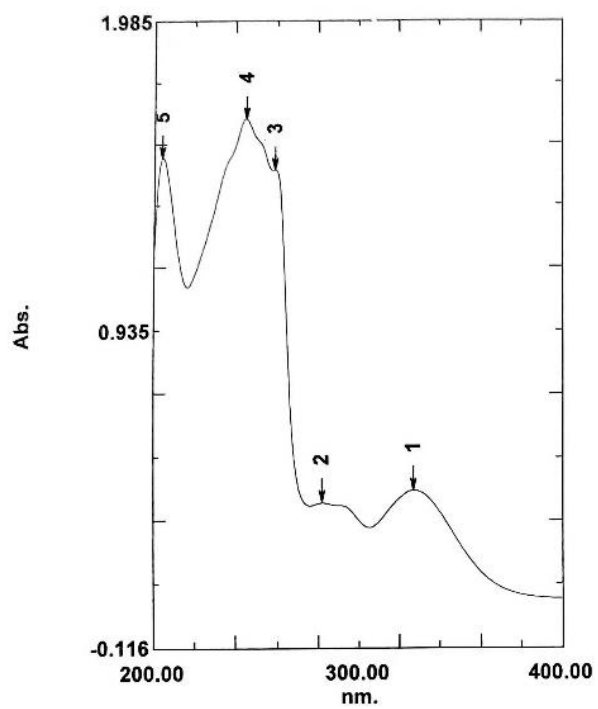

**Figure S9:** UV spectrum of **1** in MeOH.

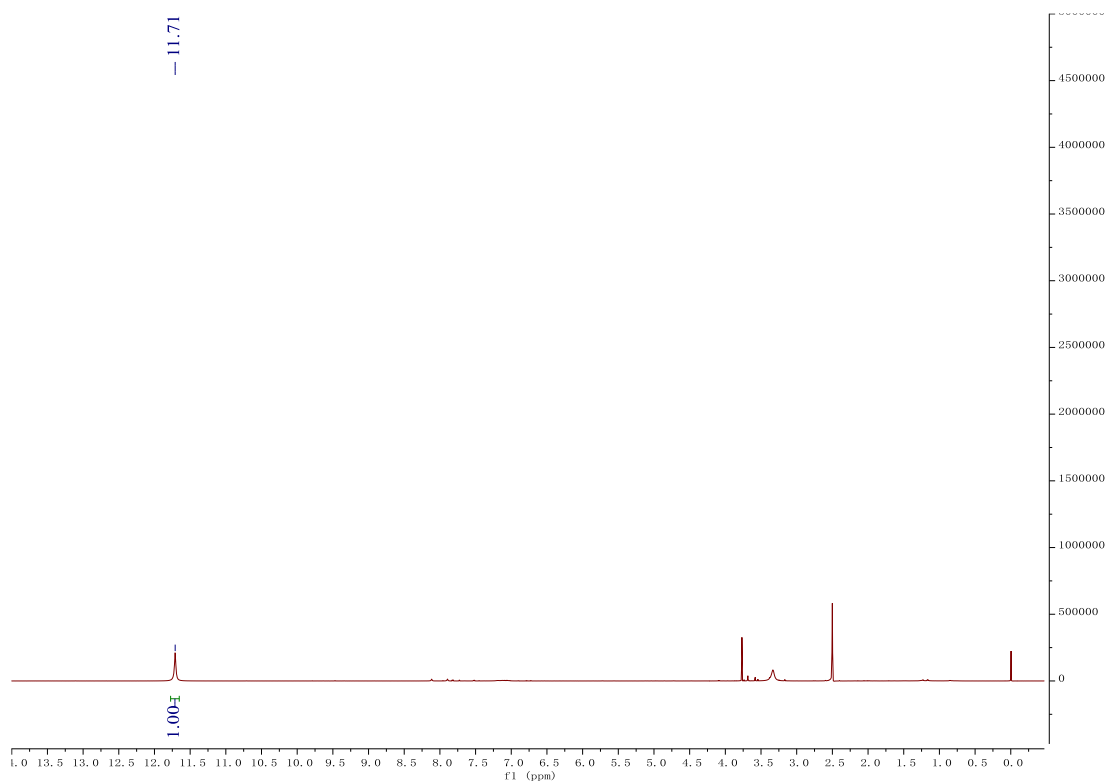

**Figure S10:**  $^1\text{H}$  NMR spectrum of **3** in  $\text{DMSO}-d_6$ .

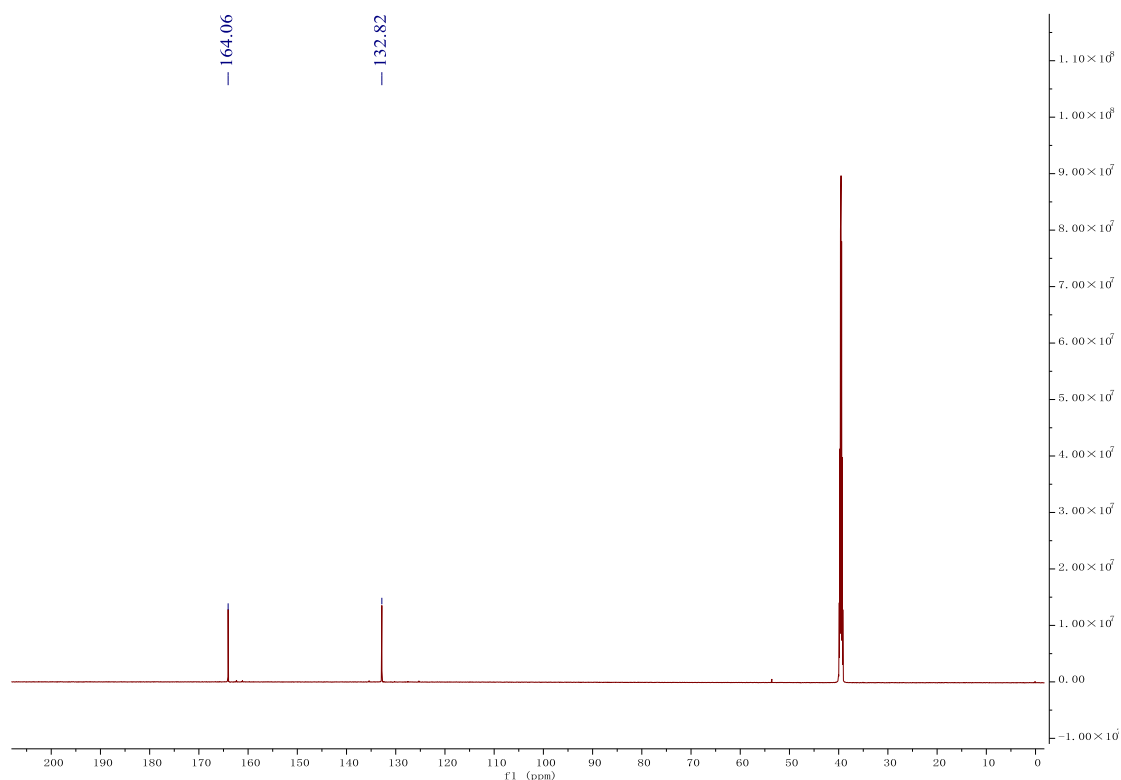

**Figure S11:**  $^{13}\text{C}$  NMR spectrum of **3** in  $\text{DMSO-}d_6$ .

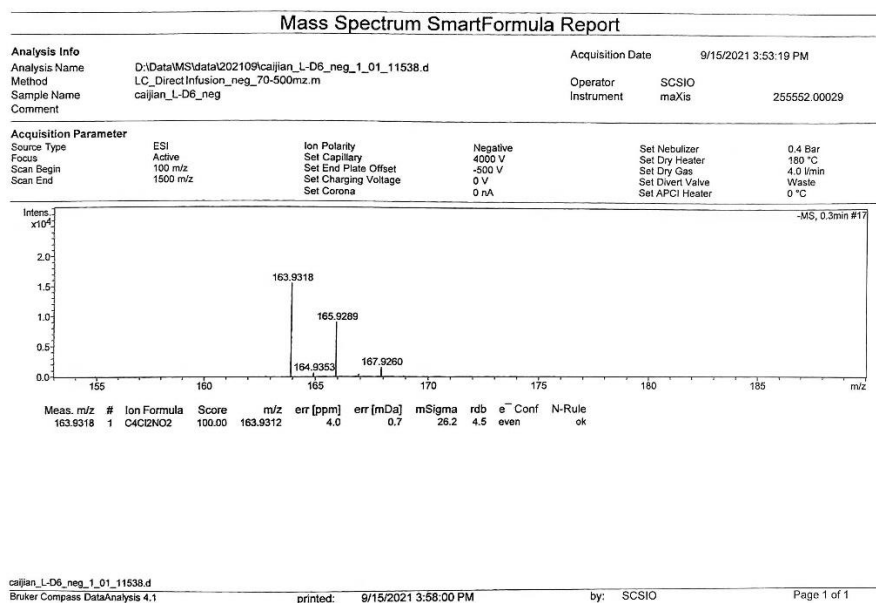

**Figure S12:** HRESIMS spectrum of **3**.

# IR Spectrum report

SHIMADZU

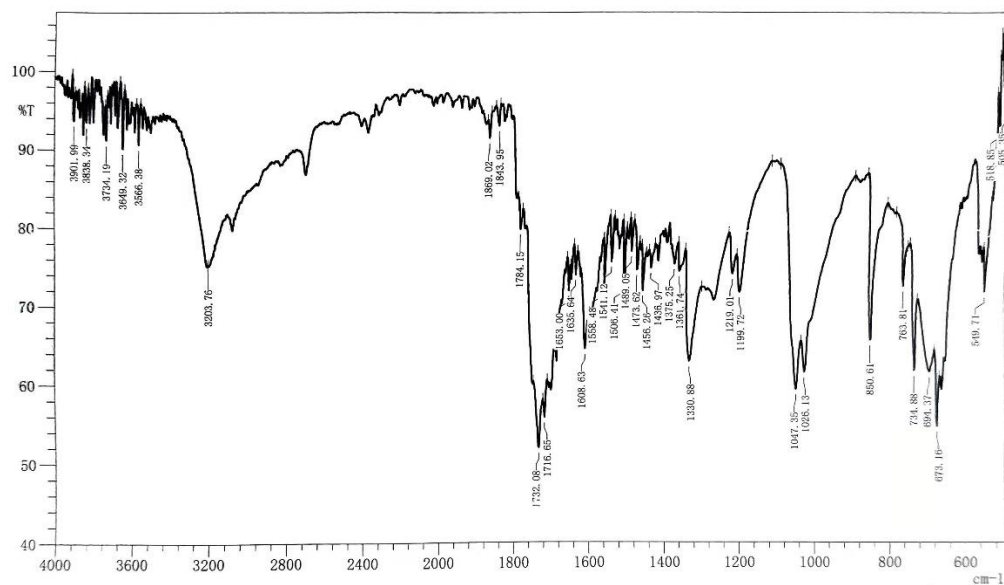

Figure S13: IR spectrum of 3.

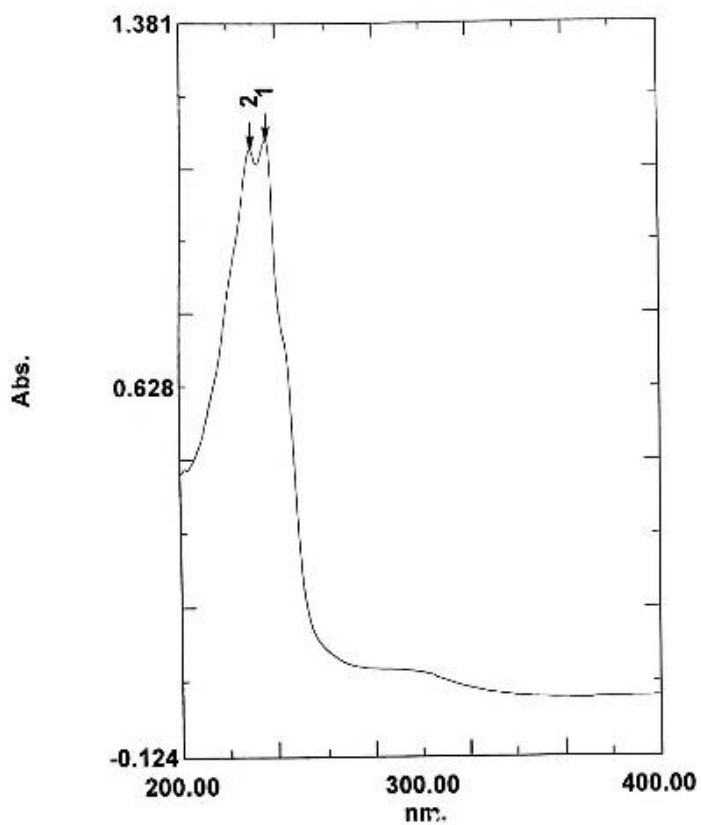

Figure S14: UV spectrum of 3 in MeOH.

**ITS sequence of the strain *Mollisia* sp. SCSIO41409**

TATTGATATGCTTAAGTTCAGCGGGTATCCCTACTTGATCCGAGGTCAACCTTTAAAAAT  
TGGGGGTTTAATAGCAGGACACGCAGACTTAACTGGATTACACTATCCACCGGCAGG  
CTCTGTAGCGAGAAGAAATTACTACGCTTAGGACCCGCAGGTGACGCTACTGGACTCT  
AGGGCTGCAAAATTCGCAATCCCCAACACCAAGACAGGCTTGAGTGGTTATAATGACG  
CTCGAACAAGCATACCCGGCGGAATACCACCGGGTGCAATGTGCGTTCAAAGATTCTGA  
TGATTCACTGAATTCTGCAATTCACATTACTTATCGCATTTTCGCTGCGTTCTTCATCGATG  
CCAGAACCAAGAGATCCGTTGTTGAAAGTTTTAACTATTATATAGTACTCAGACATCAC  
TAACATTCAAGAGTTTGGTCCTCTGGCAGGCACATGCAGGCAGAGCCCACAGTGGGAG  
ACCACGGCCTGCCAAAGCAACAAGAGTATGTAGACACGGATG
